# Supplementary material for: Awareness-driven behavior changes can shift the shape of epidemics away from peaks and toward plateaus, shoulders, and oscillations
Source: PubMed Central journal article supplement (PMC7768772; doi:10.1073/pnas.2009911117), 2020-12-01
Supplement: pnas.2009911117.sapp.pdf [file pnas.2009911117.sapp.pdf]

## Supplementary Information

### Awareness-driven Behavior Changes Can Shift the Shape of Epidemics Away from Peaks and Towards Plateaus, Shoulders, and Oscillations

Joshua S. Weitz,<sup>1,2,3</sup> Sang Woo Park,<sup>4</sup> Ceyhan Eksin,<sup>5</sup> and Jonathan Dushoff<sup>6,7</sup>

<sup>1</sup> *School of Biological Sciences, Georgia Institute of Technology, Atlanta, GA, USA*

<sup>2</sup> *School of Physics, Georgia Institute of Technology, Atlanta, GA, USA*

<sup>3</sup> *Center for Microbial Dynamics and Infection, Georgia Institute of Technology, Atlanta, GA, USA*

<sup>4</sup> *Department of Ecology and Evolutionary Biology, Princeton University, Princeton, NJ, USA*

<sup>5</sup> *Department of Industrial and Systems Engineering,  
Texas A&M University, College Station, Texas, USA*

<sup>6</sup> *Department of Biology, McMaster University, Hamilton, ON, Canada*

<sup>7</sup> *DeGroot Institute for Infectious Disease Research, McMaster University, Hamilton, ON, Canada*

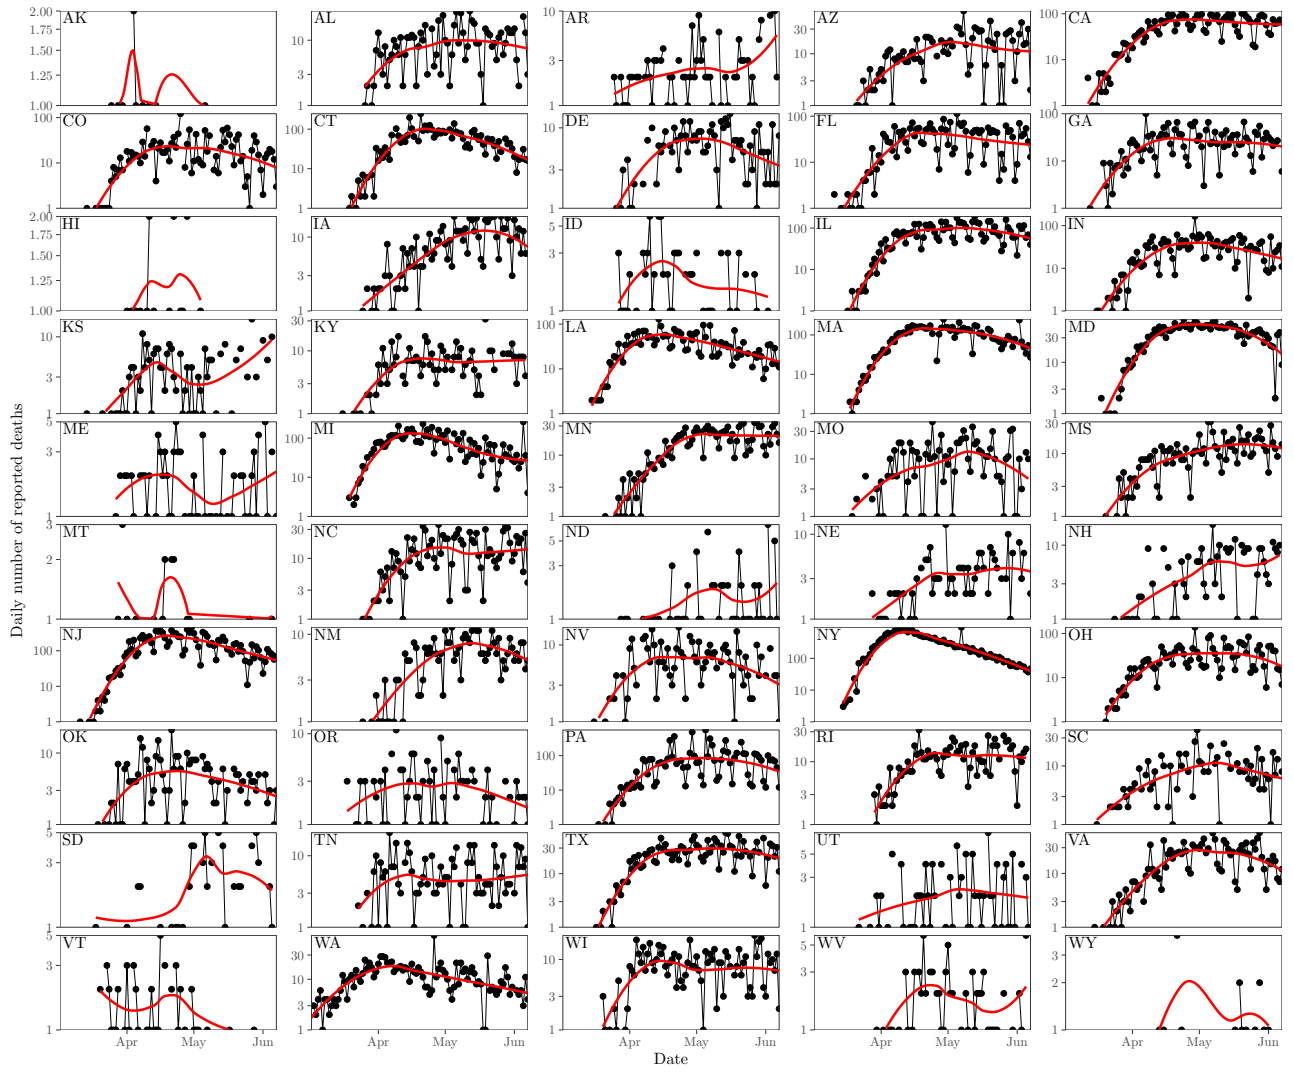

FIG. S1: Daily number of reported deaths for COVID-19 (black points and lines) and the corresponding locally estimated scatterplot smoothing (LOESS) curves (red lines) in 50 states.

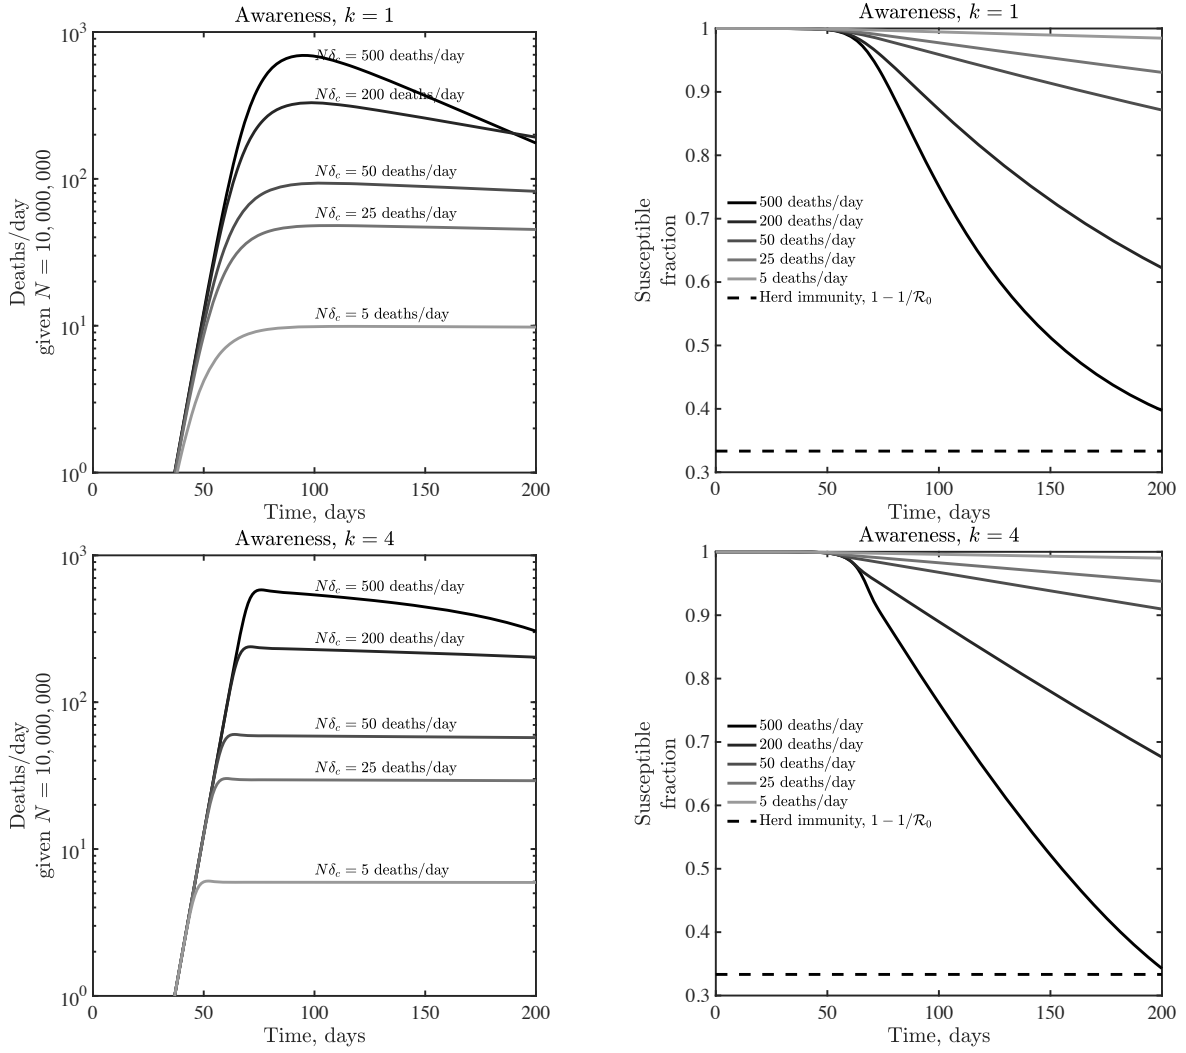

FIG. S2: Dynamics given variation in the critical fatality awareness level,  $\delta_c$  for awareness  $k = 1$  (top) and  $k = 4$  (bottom). Panels show deaths/day (top) and the susceptible fraction as a function of time (bottom), the latter compared to a herd immunity level when only a fraction  $1/\mathcal{R}_0$  remain susceptible. These simulations share the epidemiological parameters  $\beta = 0.5$  /day,  $\mu = 1/2$  /day,  $\gamma = 1/6$  /day, and  $f_D = 0.01$ .

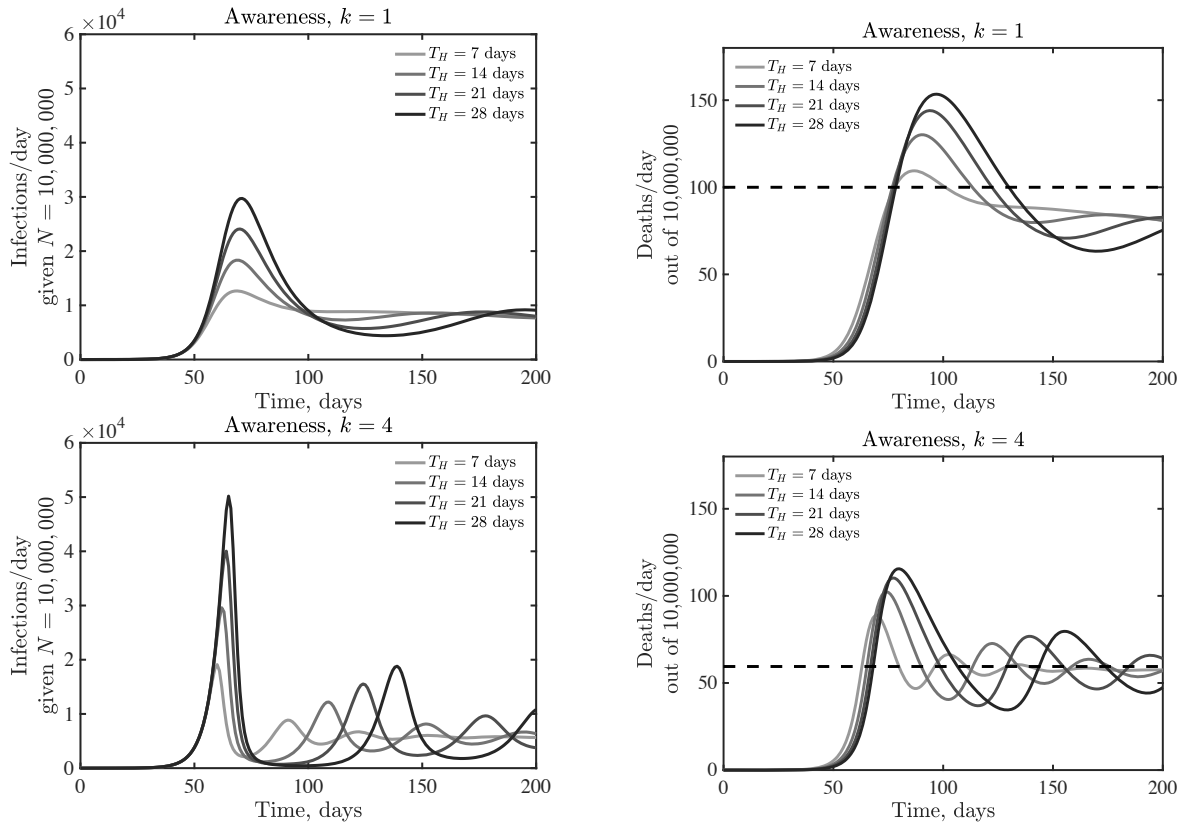

FIG. S3: Emergence of oscillatory dynamics in a death-driven awareness model of social distancing given lags between infection and fatality. Awareness is  $k = 1$  (top) and  $k = 4$  (bottom), all other parameters as in Figure 3. The dashed lines for fatalities expected quasi-stationary value  $\delta^{(a)}$ .

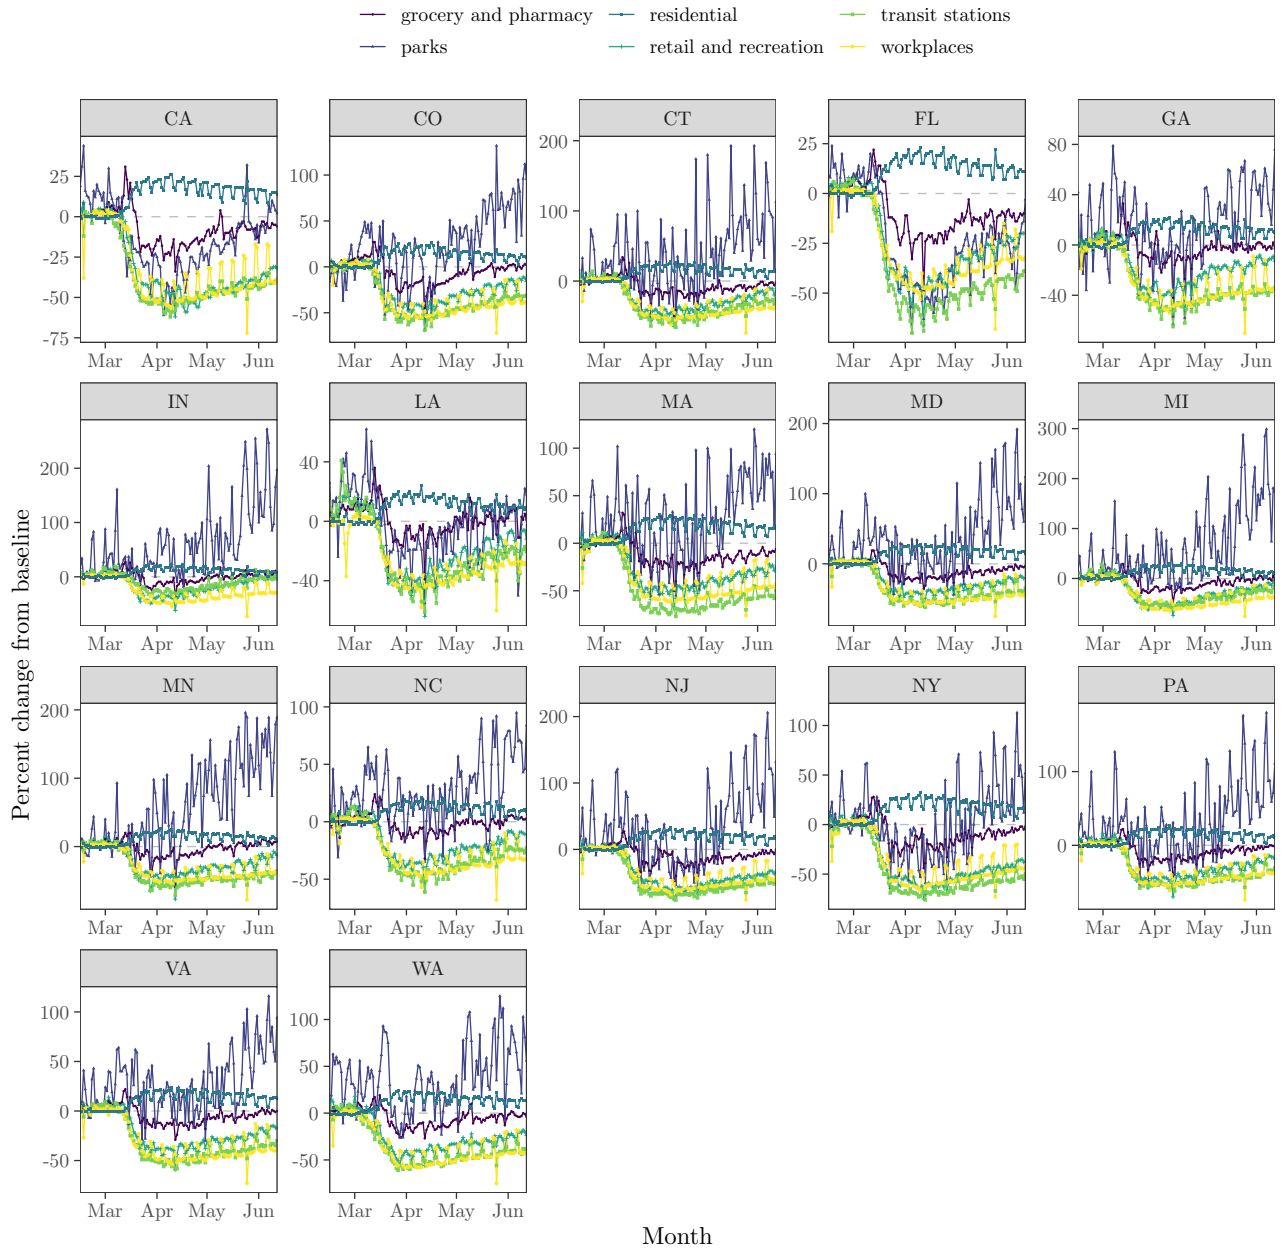

FIG. S4: Percent mobility change from baseline across six categories in 17 states.
